# Supplementary material for: TGF-β induces M2-like macrophage polarization via SNAIL-mediated suppression of a pro-inflammatory phenotype
Source: PubMed Central journal article supplement (PMC5239552; doi:10.18632/oncotarget.10561), 2016-07-13
Supplement: oncotarget-07-52294-s001.pdf [file oncotarget-07-52294-s001.pdf]

## TGF- $\beta$ induces M2-like macrophage polarization via SNAIL-mediated suppression of a pro-inflammatory phenotype

### SUPPLEMENTARY TABLES

Supplementary Table S1: Real-Time primers of human genes

| Gene          | Forward primer                | Reverse primer                   |
|---------------|-------------------------------|----------------------------------|
| HLA-DR        | 5'- GCCCAACCTGGAAATCATGACA-3' | 5'- AGGGCTGTTGTGAGCACA-3'        |
| IL-12p35      | 5'- GATGAGCTGATGCAGGCC-3'     | 5'- AGTCCTCCACCTCGTTGTCCGTGA-3'  |
| CD80          | 5'- GGGAAAGTGTACGCCCTGTA-3'   | 5'- GCTACTTCTGTGCCACCAT-3'       |
| iNOS          | 5'- AGCTGAACTTGAGCGAGGAG-3'   | 5'- GGAAAAGACTGCACCGAAGA-3'      |
| TNF- $\alpha$ | 5'- CCCAGGGCTCCAGAAGGT-3'     | 5'- TGGGGCAGAGGGTTGATTAGTTG-3'   |
| MCP-1         | 5'- AAGATCTCAGTGCAGAGGCTCG-3' | 5'- CACAGATCTCCTGGCCACAA-3'      |
| CXCR4         | 5'- CACTTCAGATAACTACACCG-3'   | 5'- ATCCAGACGCCAACATAGAC-3'      |
| IL-10         | 5'- AACAAGAGCAAGGCCGTGG-3'    | 5'- GAAGATGTCAAACACTACTCATGGC-3' |
| ARG1          | 5'- -CAGATATGCAGGGAGTCACC-3'  | 5'- CAGAAGAATGGAAGAGTCAG-3'      |
| VEGFA         | 5'- GAAGAAGCAGCCCATGACAG-3'   | 5'- GATCCTGCCCTGTCTCTCTG-3'      |
| Snail         | 5'- GACCACTATGCCGCGCTCTT-3'   | 5'- TCGCTGTAGTTAGGCTTCCGATT-3'   |
| GAPDH         | 5'- GCACCGTCAAGGCTGAGAAC-3'   | 5'- TGGTGAAGACGCCAGTGGA-3'       |

Notes: IL, interleukin; iNOS, inducible nitric oxide synthase; TNF- $\alpha$ , tumor necrosis factor alpha; MCP-1, monocyte chemoattractant protein 1; CXCR4, chemokine CXC chemokine receptor 4; VEGFA, vascular endothelial growth factor A; ARG1, arginase 1; GAPDH, glyceraldehyde-3-phosphate dehydrogenase.

Supplementary Table S2: Real-Time primers of murine genes

| Gene          | Forward primer                  | Reverse primer                 |
|---------------|---------------------------------|--------------------------------|
| iNOS          | 5'- GTTCTCAGCCCAACAATAACAAGA-3' | 5'- GTGGACGGGTTCGATGTCAC-3'    |
| IFN- $\beta$  | 5'- CCCTATGGAGATGACGGAGA-3'     | 5'- CTGTCTGCTGGTGGAGTTCA-3'    |
| TNF- $\alpha$ | 5'- CGGTGCCTATGTCTCAGCCT-3'     | 5'- GAGGGTCTGGGCCATAGAAC-3'    |
| IL-6          | 5'- AGTTGCCTTCTTGGGACTGA-3'     | 5'- TCCACGATTTCCAGAGAAC-3'     |
| IL-12p35      | 5'- CTGTGCCTTGGTAGCATCTA-3'     | 5'- TTTCACTCTGTAAGGGTCTG-3'    |
| IL-12p40      | 5'- AGGTGCGTTCCTCGTAGAGA-3'     | 5'- AAAGCCAACCAAGCAGAAGA-3'    |
| MCP-1         | 5'- ATCCCAATGAGTAGGCTGGAGAGC-3' | 5'- CAGAAGTGCTTGAGGTGGTTGTG-3' |
| CXCL10        | 5'- CGGAATCTAAGACCATCAA-3'      | 5'- TCACCTTTCAGAAGACCAA-3'     |
| CCL12         | 5'- ACTTCTATGCCTCCTGCTC-3'      | 5'- CACTGGCTGCTTGTGATTC-3'     |
| CCL22         | 5'- ATTACGTCGGTTACCGTCTG-3'     | 5'- TAGGCTCTTCATTGGCTCAG-3'    |
| YM1           | 5'- TTATCCTGAGTGACCCTTCTAAG-3'  | 5'- TCATTACCCTGATAGGCATAGG-3'  |
| MR            | 5'- GCTGAATCCCAGAAATCCGC-3'     | 5'- ATCACAGGCATACAGGGTGAC-3'   |
| Snail         | 5'- TCTGAAGATGCACATCCGAGC-3'    | 5'- TTGCAAGTGGGAGCAGGAGAAT-3'  |
| GAPDH         | 5'- TGTGTCCGTCGTGGATCTGA-3'     | 5'- TTGCTGTTGAAGTCGCAGGAG-3'   |

Notes: iNOS, inducible nitric oxide synthase; IFN, interferon; TNF- $\alpha$ , tumor necrosis factor alpha; IL, interleukin; MCP-1, monocyte chemoattractant protein 1; CXCL, chemokine CXC chemokine ligand; CCL, chemokine (C-C motif) ligand; MR, mannose receptor; GAPDH, glyceraldehyde-3-phosphate dehydrogenase.
